# Supplementary material for: NIR-enhanced multi-mode catalytic activity over Pd nanocrystals sandwiched within magnetic polydopamine hollow spheres
Source: Royal Society of Chemistry journal article supplement (doi:10.1039/d4ce00490f), 2024-01-01
Supplement: d4ce00490f1.pdf [file d4ce00490f1.pdf]

## Supporting Information

### **NIR-Enhanced Multi-Mode Catalytic Activity over Pd Nanocrystals Sandwiched within Magnetic Polydopamine Hollow-spheres**

Jie Jin<sup>a,\*</sup>, Haoran Li<sup>a</sup>, Shanshan Wu<sup>a</sup>, Jing Wang<sup>b</sup>, Qunling Fang<sup>b</sup>, Chunyan Xu<sup>c,\*</sup>,  
Yunqi Xu<sup>d</sup>, Weili Kong<sup>a</sup>, Di Wang<sup>a</sup>, Shouhu Xuan<sup>d,\*</sup>

*<sup>a</sup> School of Materials and Chemical Engineering, Anhui Jianzhu University, Hefei,  
230601, PR China*

*<sup>b</sup> School of Food and Biological Engineering, Hefei University of Technology, Hefei,  
230009, PR China*

*<sup>c</sup> School of Resources and Environmental Engineering, Anhui University, Hefei,  
230601, PR China*

*<sup>d</sup> CAS Key Laboratory of Mechanical Behavior and Design of Materials, Department  
of Modern Mechanics, University of Science and Technology of China, Hefei, 230026,  
PR China*

\*Corresponding author:

Prof. Shouhu Xuan

E-mail: xuansh@ustc.edu.cn

Asso. Prof. Jie Jin

E-mail: jinjie@ahjzu.edu.cn

Asso. Prof. Chunyan Xu

E-mail: Chunyan.xu@ahu.edu.cn

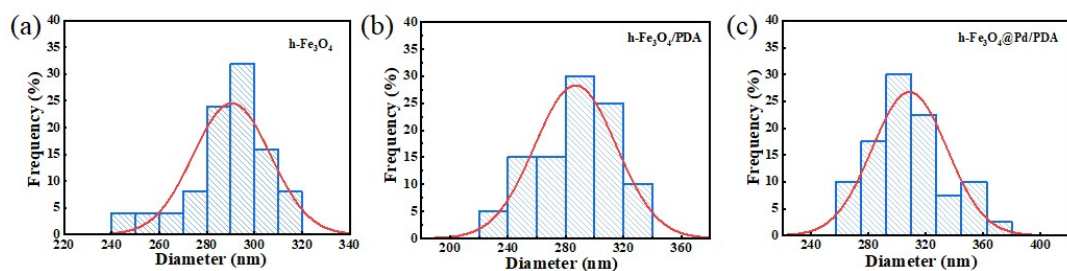

**Fig. S1.** Size distribution histogram of h-Fe<sub>3</sub>O<sub>4</sub> (a), h-Fe<sub>3</sub>O<sub>4</sub>/PDA (b), h-Fe<sub>3</sub>O<sub>4</sub>@Pd/PDA hollow-spheres (c).

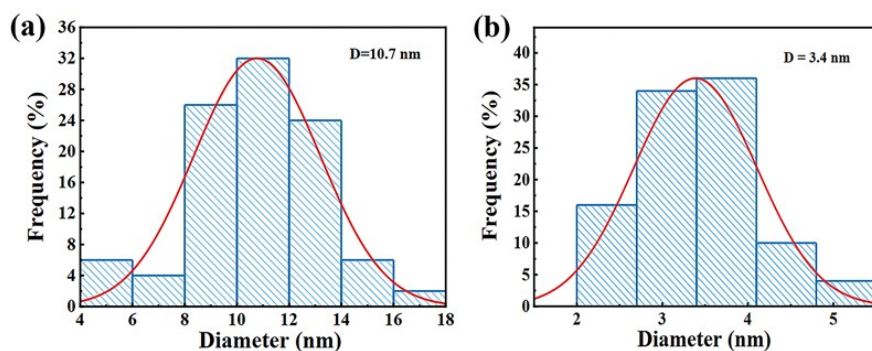

**Fig. S2.** The size of Pd nanocrystals with sodium citrate as a stabilizer (a), PVP as a stabilizer (b).

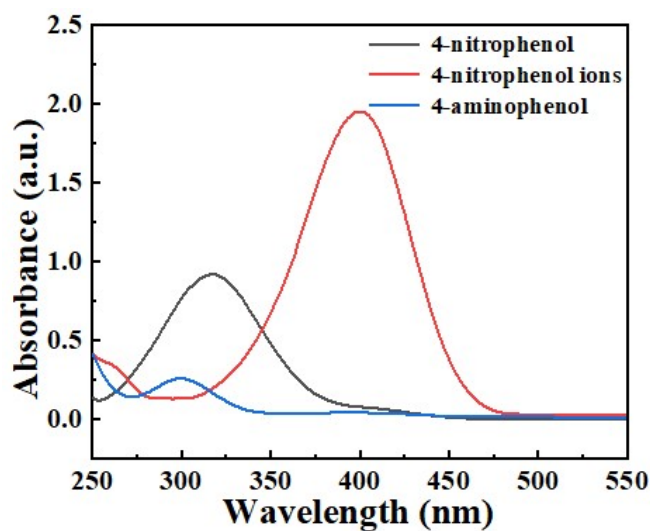

**Fig. S3.** UV-Vis absorption spectra of 4-nitrophenol, 4-aminophenol and 4-nitrophenol ions.

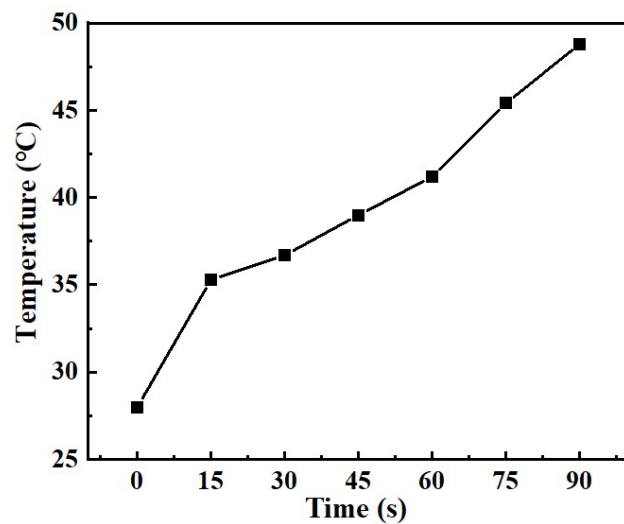

**Fig. S4.** Time-dependent temperature detected for 4-nitrophenol reaction solution under NIR laser (808 nm,  $2.0 \text{ W cm}^{-2}$ ) irradiation.

**Table. S1.** The content of Pd metal determined by ICP-AES

| Samples<br>Element | h-Fe <sub>3</sub> O <sub>4</sub> @Pd/PDA<br>with $4.4 \times 10^{-5}$<br>mol H <sub>2</sub> PdCl <sub>4</sub> | h-Fe <sub>3</sub> O <sub>4</sub> @Pd/PDA<br>with $8.8 \times 10^{-5}$<br>mol H <sub>2</sub> PdCl <sub>4</sub> | h-Fe <sub>3</sub> O <sub>4</sub> @Pd/PDA<br>with $13.2 \times 10^{-5}$<br>mol H <sub>2</sub> PdCl <sub>4</sub> |
|--------------------|---------------------------------------------------------------------------------------------------------------|---------------------------------------------------------------------------------------------------------------|----------------------------------------------------------------------------------------------------------------|
| Pd                 | 13.2 wt%                                                                                                      | 19.3 wt%                                                                                                      | 24.7 wt%                                                                                                       |
